# Supplementary material for: Detection of Prostate Cancer Antigen 3 and Prostate Cancer Susceptibility Candidate in Non-DRE Urine Improves Diagnosis of Prostate Cancer in Chinese Population
Source: Hindawi journal article supplement (doi:10.1155/2020/3964615), 2020-01-31
Supplement: f1 [file 3964615.f1.pdf]

1 **Detection of Prostate Cancer Antigen 3 and Prostate Cancer Susceptibility Candidate in Non-**  
2 **DRE urine Improves Diagnosis of Prostate Cancer in Chinese**

3 Lie-Fu Ye<sup>1, 2</sup>, Sha He<sup>2</sup>, Xiaopei Wu<sup>3</sup>, Shengying Jiang<sup>3</sup>, Ruo-Chen Zhang<sup>1</sup>, Ze-Song Yang<sup>1</sup>, Fa-Wen  
4 Chen<sup>4</sup>, Dan-Ling Pan<sup>5</sup>, Dong Li<sup>6</sup>, Gang Li<sup>3</sup>

5

6 **Running title:** exoPCA3/PRAC improves diagnosis of prostate cancer in Chinese

7 <sup>1</sup>Department of Urology, Fujian Provincial Hospital, Fuzhou, Fujian, <sup>2</sup>Fujian Medical University  
8 Provincial Clinical College, Fuzhou, Fujian, <sup>3</sup>Fuzhou L-BioMedx Technology Co., Ltd., Fuzhou,  
9 Fujian, <sup>4</sup>Clinical Laboratory, Fujian Provincial Hospital, Fuzhou, Fujian, <sup>5</sup>Department of Pathology,  
10 Fujian Provincial Hospital, Fuzhou, Fujian, <sup>6</sup>School of Medicine, Nankai University, Tianjin, China

11 L. Ye and S. He contributed equally to this paper.

12

13 Address Correspondence to: Gang Li, Fuzhou L-BioMedx Technology Co., Ltd., B-822, Building  
14 10, Haixiyuan, Gaoxin District, Fuzhou, Fujian, China 350108

15 Phone: 086-591-62085629

16 Fax: 086-591-62085629

17 E-mail: [gli9809@gmail.com](mailto:gli9809@gmail.com)

18

19 Emails for other co-authors:

20 Lie-Fu Ye [yelifu@126.com](mailto:yelifu@126.com)

21 Sha He [1121262902@qq.com](mailto:1121262902@qq.com)

22 Xiaopei Wu [lbs\\_wuxp@163.com](mailto:lbs_wuxp@163.com)

23 Shengying Jiang [1805961889@qq.com](mailto:1805961889@qq.com)

24 Ruo-Chen Zhang [441374690@qq.com](mailto:441374690@qq.com)

25 Ze-Song Yang [33320298@qq.com](mailto:33320298@qq.com)

26 Fa-Wen Chen [chenfawen@163.com](mailto:chenfawen@163.com)

27 Dan-Ling Pan [pandanling0909@sina.com](mailto:pandanling0909@sina.com)

28 Dong Li [lidong@nankai.edu.cn](mailto:lidong@nankai.edu.cn)

29

30

31

**Suppl Table 1. Subjects Clinical Characteristics in Validation Cohort**

| <b>Characteristic</b>           | <b>Median (range)<br/>or %</b> | <b>Number<br/>(count/available)</b> |
|---------------------------------|--------------------------------|-------------------------------------|
| Intended use population         | 100%                           | 28                                  |
| Age                             | 65 (51-810)                    | 28                                  |
| Pre-biopsy serum PSA<br>(ng/ml) | 10.32 (4.8-17.91)              | 28                                  |
| 1-10ng/ml                       | 46.4%                          | 13/28                               |
| 10-20ng/ml                      | 53.6%                          | 15/28                               |
| Suspicious DRE                  | 10%                            | 1/10                                |
| No prior biopsy                 | 89.3%                          | 25/28                               |
| Median number of cores          | 10 (10-12)                     | 28                                  |
| Biopsy result positive          | 39.3%                          | 11/28                               |
| <u>Gleason score</u>            |                                |                                     |
| GS=6 (3+3)                      | 17.9%                          | 5/28                                |
| GS≥7                            | 21.4%                          | 6/28                                |
| GS=7 (3+4)                      | 10.7%                          | 3/28                                |
| GS=7 (4+3)                      | 3.6%                           | 1/28                                |
| GS=8 (4+4)                      | 3.6%                           | 1/28                                |
| GS=9 (5+4)                      | 3.6%                           | 1/28                                |
